# Supplementary material
Source: PubMed Central journal article supplement (PMC10603786)

**Object S1.**

PubMed Search String:

(incentiv\*[Title/Abstract] OR cash[Title/Abstract] OR money[Title/Abstract] OR token\*[Title/Abstract] OR payment\*[Title/Abstract] OR voucher\*[Title/Abstract] OR contingency management[Title/Abstract] OR prize\*[Title/Abstract]) AND (complian\*[Title/Abstract] OR adhere\*[Title/Abstract] OR attend\*[Title/Abstract] OR medication\*[Title/Abstract] OR therap\*[Title/Abstract] OR appointment\*[Title/Abstract]) AND (psychiatr\*[Text Word] OR mental health[Text Word] OR mental illness[Text Word] OR substance[Text Word])

**Table S1.***Previous Meta-Analyses Examining Financial Incentives/Contingency Management for Treatment Attendance or Medication Adherence*

| Meta-Analysis                                                                                                                                                                                                                                                                                              | Outcomes examined                                                                                    | Study Population                                      | Number of Studies Included | Studies Included in Present Meta-Analysis | Relevant Results                                                                                                            | Relevant Limitations                                                                                                                                                                      |
|------------------------------------------------------------------------------------------------------------------------------------------------------------------------------------------------------------------------------------------------------------------------------------------------------------|------------------------------------------------------------------------------------------------------|-------------------------------------------------------|----------------------------|-------------------------------------------|-----------------------------------------------------------------------------------------------------------------------------|-------------------------------------------------------------------------------------------------------------------------------------------------------------------------------------------|
| Bolívar, H. A., Klemperer, E. M., Coleman, S. R., DeSarno, M., Skelly, J. M., & Higgins, S. T. (2021). Contingency management for patients receiving medication for opioid use disorder: A systematic review and meta-analysis. <i>JAMA psychiatry</i> , 78(10), 1092-1102.                                | Drug use; cigarette smoking; therapy attendance; medication adherence                                | Patients receiving medication for opioid use disorder | 60                         | Kidorf et al., 2018; Preston et al., 1999 | Incentives improved therapy attendance (Cohen's $d = 0.78$ ) and medication adherence (Cohen's $d = 0.43$ )                 | Focused on a limited group of patients receiving medication for opioid use disorder; Unable to isolate the effects of targeting attendance and medication adherence versus other outcomes |
| Dutra, L., Stathopoulou, G., Basden, S. L., Leyro, T. M., Powers, M. B., & Otto, M. W. (2008). A meta-analytic review of psychosocial interventions for substance use disorders. <i>American Journal of Psychiatry</i> , 165(2), 179-187.                                                                  | Efficacy of all psychosocial treatments for substance use disorders; abstinence; treatment retention | Individuals with substance use disorders              | 34                         | Sinha et al., 2003                        | Drop out prior to treatment completion across all psychosocial treatments was 35.4% compared to 44.6% in control conditions | Drop out was aggregated across multiple psychosocial treatments                                                                                                                           |
| Ellis, J. D., Struble, C. A., Fodor, M. C., Cairncross, M., Lundahl, L. H., & Ledgerwood, D. M. (2021). Contingency management for individuals with chronic health conditions: A systematic review and meta-analysis of randomized controlled trials. <i>Behaviour Research and Therapy</i> , 136, 103781. | Weight change; physical activity; medication/device adherence; viral load                            | Individuals with chronic health conditions            | 20                         | None                                      | Incentives improved medication/device adherence (Cohen's $d = 0.66$ )                                                       | Focus not on mental health treatment; adherence to medications and devices was aggregated                                                                                                 |
| Getty, C. A., Morande, A., Lynskey, M., Weaver, T., & Metrebian, N. (2019). Mobile telephone-delivered contingency management interventions promoting behaviour change in individuals with substance use disorders: A meta-analysis. <i>Addiction</i> , 114(11), 1915-1925.                                | Abstinence; medication adherence                                                                     | Individuals with substance use disorders              | 7                          | None                                      | Only one study targeted medication adherence so the effect size could not be calculated                                     | Only one study targeted medication adherence; all interventions delivered via mobile technology                                                                                           |

|                                                                                                                                                                                                                                                                                                   |                                                                                                                     |                                                 |    |                                                                                                       |                                                                                                                                                               |                                                                                                                                                                  |
|---------------------------------------------------------------------------------------------------------------------------------------------------------------------------------------------------------------------------------------------------------------------------------------------------|---------------------------------------------------------------------------------------------------------------------|-------------------------------------------------|----|-------------------------------------------------------------------------------------------------------|---------------------------------------------------------------------------------------------------------------------------------------------------------------|------------------------------------------------------------------------------------------------------------------------------------------------------------------|
| Giles, E. L., Robalino, S., McColl, E., Snichotta, F. F., & Adams, J. (2014). The effectiveness of financial incentives for health behaviour change: Systematic review and meta-analysis. <i>PloS one</i> , 9(3), e90347.                                                                         | Smoking cessation; vaccine/screening attendance; physical activity                                                  | Individuals attempting health behavior change   | 15 | None                                                                                                  | Incentives increased vaccine/screening attendance (relative risk: 1.92)                                                                                       | Focus not on mental health treatment                                                                                                                             |
| Krishnamoorthy, Y., Rehman, T., & Sakthivel, M. (2021). Effectiveness of financial incentives in achieving UNAID fast-track 90-90-90 and 95-95-95 target of HIV care continuum: A systematic review and meta-analysis of randomized controlled trials. <i>AIDS and Behavior</i> , 25(3), 814-825. | HIV testing uptake; antiretroviral (ART) treatment initiation, adherence, and continuity of care; viral suppression | Individuals with HIV                            | 22 | None                                                                                                  | Incentives significantly increased ART treatment adherence (relative risk = 1.30) and continuity of care (relative risk = 1.24), but not treatment initiation | Focus not on mental health treatment                                                                                                                             |
| Lussier, J. P., Heil, S. H., Mongeon, J. A., Badger, G. J., & Higgins, S. T. (2006). A meta-analysis of voucher-based reinforcement therapy for substance use disorders. <i>Addiction</i> , 101(2), 192-203.                                                                                      | Abstinence; treatment attendance; medication adherence                                                              | Individuals with substance use disorders        | 30 | Helmus et al., 2003; Preston et al., 1999; Sinha et al., 2003; Svikis et al., 1997                    | Incentives increased treatment attendance (Pearson's $r = .15$ ) and medication adherence (Pearson's $r = .32$ )                                              | Unable to isolate the effects of targeting treatment attendance and medication adherence versus other outcomes                                                   |
| Petry, N. M., Rash, C. J., Byrne, S., Ashraf, S., & White, W. B. (2012). Financial reinforcers for improving medication adherence: Findings from a meta-analysis. <i>The American Journal of Medicine</i> , 125(9), 888-896.                                                                      | Medication adherence                                                                                                | Individuals taking medication for any condition | 21 | Preston et al., 1999                                                                                  | Incentives increased medication adherence (Cohen's $d = 0.77$ )                                                                                               | Included both medications for general health and mental health conditions; Unable to isolate the effects of targeting medication adherence versus other outcomes |
| Pfund, R. A., Ginley, M. K., Rash, C. J., & Zajac, K. (2021). Contingency management for treatment attendance: A meta-analysis. <i>Journal of Substance Abuse Treatment</i> , 108556.                                                                                                             | Treatment attendance; Abstinence                                                                                    | Individuals with substance use disorders        | 10 | Carroll et al., 2012; Jones et al., 2001; Kidorf et al., 2013; Petry et al., 2012; Petry et al., 2018 | Incentives increased treatment attendance (Cohen's $d = 0.47$ )                                                                                               | Unable to isolate the effects of targeting treatment attendance versus other outcomes                                                                            |

Note. No previous meta-analyses included treatment goal completion outcomes

**Table S2. Study Characteristics for Main Outcomes**

| Study                                | Outcome           | Age  | Proportion Female | Proportion Minority | Disorder Targeted | Met Criteria | Design  | Randomized | Study Quality | Sample Size | Effect Size Description                                                     | Effect Size Designation | Effect Size Type  | Effect Size | Effect Size SE |
|--------------------------------------|-------------------|------|-------------------|---------------------|-------------------|--------------|---------|------------|---------------|-------------|-----------------------------------------------------------------------------|-------------------------|-------------------|-------------|----------------|
| Acquavita et al., 2013               | <u>Attendance</u> | 44.0 | 38.2              | 85.3                | SUD               | No           | Between | No         | Strong        | 100         | Number of treatment contacts during the first 30 days                       | Not primary             | Hedge's $g_s$     | 0.51        | 0.20           |
|                                      |                   |      |                   |                     |                   |              |         |            |               | 211         | % of participants admitted to an outpatient program                         | Not primary             | Hedge's $g_s$     | 0.41        | 0.16           |
|                                      |                   |      |                   |                     |                   |              |         |            |               | 211         | % of participants receiving an outpatient appointment                       | Not primary             | Hedge's $g_s$     | 0.85        | 0.18           |
|                                      |                   |      |                   |                     |                   |              |         |            |               | 211         | % of participants making initial contact with outpatient program            | Not primary             | Hedge's $g_s$     | 0.41        | 0.17           |
| Barton et al., 2020                  | <u>Attendance</u> | Msg  | 16.4              | 27.4                | SUD               | No           | Between | No         | Moderate      | 73          | Mean number of sessions attended                                            | Primary                 | Hedge's $g_s$     | -0.32       | 0.24           |
|                                      |                   |      |                   |                     |                   |              |         |            |               | 73          | Maximum number of consecutive sessions attended                             | Not primary             | Hedge's $g_s$     | -0.04       | 0.23           |
| Carey & Carey, 1990                  | <u>Attendance</u> | 33.2 | 28.0              | 13.0                | SMI               | Yes          | Within  | No         | Strong        | 53          | Number of patients meeting program attendance criterion                     | Primary                 | Hedge's $g_{woc}$ | 0.44        | 0.04           |
| Carroll et al., 2012                 | <u>Attendance</u> | 25.7 | 15.7              | 81.1                | SUD               | Yes          | Between | Yes        | Moderate      | 68          | Number of days in treatment                                                 | Primary                 | Hedge's $g_s$     | 0.53        | 0.25           |
| Carroll et al., 2012                 | <u>Tx goals</u>   | 25.7 | 15.7              | 81.1                | SUD               | Yes          | Between | Yes        | Moderate      | 68          | Average number of homework assignments completed                            | Primary                 | Hedge's $g_s$     | 0.86        | 0.25           |
| Corrigan & Bogner, 2007 <sup>a</sup> | <u>Attendance</u> | 42.5 | 38.0              | 43.0                | SUD               | Yes          | Between | Yes        | Strong        | 48          | Average appointments missed                                                 | Not primary             | Hedge's $g_s$     | 0.90        | 0.28           |
| Corrigan et al., 2005 <sup>a</sup>   | <u>Tx goals</u>   | 36.6 | 29.2              | 40.0                | SUD               | Yes          | Between | Yes        | Strong        | 99          | Days to sign treatment plan                                                 | Not primary             | Hedge's $g_s$     | 0.64        | 0.21           |
|                                      |                   |      |                   |                     |                   |              |         |            |               | 99          | Likelihood of signing treatment plan within 30 days                         | Not primary             | Hedge's $g_s$     | 0.97        | 0.26           |
| Fishman et al., 2020                 | <u>Medication</u> | 23.4 | 34.2              | 5.3                 | SUD               | Yes          | Between | Yes        | Strong        | 38          | Number of extended-release naltrexone doses received                        | Primary                 | Hedge's $g_s$     | 1.95        | 0.40           |
| Fitzsimons et al., 2015              | <u>Attendance</u> | 40.2 | 46.0              | 61.0                | SUD               | No           | Between | No         | Strong        | 262         | Average number of days attended in the first week                           | Not primary             | Hedge's $g_s$     | 0.36        | 0.12           |
|                                      |                   |      |                   |                     |                   |              |         |            |               | 262         | Average number of individual counseling sessions attended in the first week | Not primary             | Hedge's $g_s$     | 0.54        | 0.13           |
|                                      |                   |      |                   |                     |                   |              |         |            |               | 262         | Treatment utilization rate for the first week                               | Primary                 | Hedge's $g_s$     | 0.36        | 0.12           |
|                                      |                   |      |                   |                     |                   |              |         |            |               | 262         | Whether the participant returned to the clinic on treatment day 1           | Not primary             | Hedge's $g_s$     | 0.45        | 0.26           |
| Hartzler et al., 2014                | <u>Attendance</u> | Msg  | Msg               | Msg                 | SUD               | No           | Between | No         | Moderate      | 217         | Duration of consecutive weekly visits                                       | Not primary             | Hedge's $g_s$     | 0.52        | 0.14           |
|                                      |                   |      |                   |                     |                   |              |         |            |               | 217         | Mean attendance rate                                                        | Primary                 | Hedge's $g_s$     | 0.45        | 0.01           |
| Helmus et al., 2003                  | <u>Attendance</u> | 43.7 | 25.0              | 5.0                 | SUD               | Yes          | Within  | No         | Strong        | 20          | Attendance initiation                                                       | Not primary             | Hedge's $g_s$     | 0.48        | 0.19           |
|                                      |                   |      |                   |                     |                   |              |         |            |               | 20          | % of on-time group therapy attendance                                       | Primary                 | Hedge's $g_{woc}$ | 0.45        | 0.11           |

| Study                            | Outcome           | Age  | Proportion Female | Proportion Minority | Disorder Targeted        | Met Criteria | Design  | Randomized | Study Quality | Sample Size | Effect Size Description                                                                        | Effect Size Designation | Effect Size Type       | Effect Size | Effect Size SE |
|----------------------------------|-------------------|------|-------------------|---------------------|--------------------------|--------------|---------|------------|---------------|-------------|------------------------------------------------------------------------------------------------|-------------------------|------------------------|-------------|----------------|
| Jones et al., 2001               | <u>Attendance</u> | 28.0 | 100.0             | 76.0                | SUD                      | Yes          | Between | Yes        | Strong        | 75          | Average full day attendance for the residential stay                                           | Primary                 | Hedge's g <sub>s</sub> | 0.51        | 0.24           |
| Kelly et al., 2014               | <u>Attendance</u> | 40.2 | 48.0              | 32.0                | SUD                      | Yes          | Between | No         | Moderate      | 160         | Number of days patients attended program                                                       | Primary                 | Hedge's g <sub>s</sub> | 0.67        | 0.16           |
| Kidorf et al., 2009 <sup>b</sup> | <u>Attendance</u> | 41.0 | 28.8              | 75.4                | SUD                      | Yes          | Between | Yes        | Strong        | 188         | % of motivational enhancement sessions attended                                                | Primary                 | Hedge's g <sub>s</sub> | 1.76        | 0.17           |
|                                  |                   |      |                   |                     |                          |              |         |            |               | 188         | % of treatment readiness sessions attended                                                     | Primary                 | Hedge's g <sub>s</sub> | 0.89        | 0.15           |
| Kidorf et al., 2013              | <u>Attendance</u> | 39.1 | 53.6              | 35.2                | Any psychiatric disorder | Yes          | Between | Yes        | Strong        | 125         | Number of individual and group mental health sessions attended (pooled results for months 1-3) | Primary                 | Hedge's g <sub>s</sub> | 1.21        | 0.19           |
| Kidorf et al., 2018              | <u>Attendance</u> | 39.8 | 44.8              | 62.3                | SUD                      | No           | Between | Yes        | Strong        | 143         | Attendance rate for individual counseling                                                      | Not primary             | Hedge's g <sub>s</sub> | -0.22       | 0.17           |
|                                  |                   |      |                   |                     |                          |              |         |            |               | 143         | Attendance rate for group counseling                                                           | Not primary             | Hedge's g <sub>s</sub> | 0.03        | 0.17           |
| Kidorf et al., 2018              | <u>Medication</u> | 39.8 | 44.8              | 62.3                | SUD                      | No           | Between | Yes        | Strong        | 143         | Mean days in treatment                                                                         | Primary                 | Hedge's g <sub>s</sub> | 0.01        | 0.17           |
|                                  |                   |      |                   |                     |                          |              |         |            |               | 143         | Mean methadone dose                                                                            | Not primary             | Hedge's g <sub>s</sub> | 0.46        | 0.17           |
|                                  |                   |      |                   |                     |                          |              |         |            |               | 143         | Mean peak methadone dose                                                                       | Not primary             | Hedge's g <sub>s</sub> | 0.39        | 0.17           |
|                                  |                   |      |                   |                     |                          |              |         |            |               | 143         | % reaching target methadone dose                                                               | Not primary             | Hedge's g <sub>s</sub> | 0.53        | 0.17           |
| Kropp et al., 2017               | <u>Attendance</u> | Msg  | 55.0              | 6.0                 | SUD                      | No           | Between | No         | Strong        | 533         | Proportion of patients attending at least one group (1st month)                                | Not primary             | Hedge's g <sub>s</sub> | 0.22        | 0.09           |
|                                  |                   |      |                   |                     |                          |              |         |            |               | 531         | Proportion of patients attending at least one group (12th month)                               | Not primary             | Hedge's g <sub>s</sub> | -0.02       | 0.10           |
| Langhorst, 2004                  | <u>Attendance</u> | 33.0 | 36.0              | 27.0                | SUD                      | No           | Between | Yes        | Strong        | 183         | % participants with perfect attendance (attended 2 intake sessions)                            | Not primary             | Hedge's g <sub>s</sub> | -0.18       | 0.16           |
|                                  |                   |      |                   |                     |                          |              |         |            |               | 183         | % participants attending one session (intake session 1 or 2)                                   | Not primary             | Hedge's g <sub>s</sub> | 0.43        | 0.21           |
| Ledgerwood et al., 2008          | <u>Attendance</u> | 35.6 | 51.0              | 15.7                | SUD                      | No           | Between | No         | Strong        | 51          | % of sessions attended                                                                         | Primary                 | Hedge's g <sub>s</sub> | 0.51        | 0.28           |
| Litt et al., 2007                | <u>Tx goals</u>   | 45.0 | 42.0              | 14.0                | SUD                      | Yes          | Between | Yes        | Strong        | 141         | % of homework assignments completed                                                            | Primary                 | Hedge's g <sub>s</sub> | 0.26        | 0.17           |
| Marcus et al., 2020 <sup>c</sup> | <u>Medication</u> | 39.7 | 83.3              | 58.3                | Depression               | Yes          | Between | Yes        | Strong        | 80          | % of antidepressant doses taken                                                                | Primary                 | Hedge's g <sub>s</sub> | 0.80        | 0.23           |
|                                  |                   |      |                   |                     |                          |              |         |            |               | 80          | Over 80% adherence                                                                             | Not primary             | Hedge's g <sub>s</sub> | 1.12        | 0.32           |
| McKay et al., 2013               | <u>Attendance</u> | 43.2 | 24.0              | 92.5                | SUD                      | Yes          | Between | Yes        | Strong        | 166         | Average number of continuing care sessions received                                            | Primary                 | Hedge's g <sub>s</sub> | 0.78        | 0.16           |
|                                  |                   |      |                   |                     |                          |              |         |            |               | 213         | Proportion completing orientation session                                                      | Not primary             | Hedge's g <sub>s</sub> | 0.34        | 0.19           |

| Study                                                   | Outcome           | Age  | Proportion Female | Proportion Minority | Disorder Targeted  | Met Criteria | Design  | Randomized | Study Quality | Sample Size | Effect Size Description                                                 | Effect Size Designation | Effect Size Type  | Effect Size | Effect Size SE |
|---------------------------------------------------------|-------------------|------|-------------------|---------------------|--------------------|--------------|---------|------------|---------------|-------------|-------------------------------------------------------------------------|-------------------------|-------------------|-------------|----------------|
| Metrebian et al., 2021 <sup>d</sup>                     | <u>Attendance</u> | 38.2 | 26.8              | 21.2                | SUD                | Yes          | Between | Yes        | Moderate      | 347         | Attendance at the first appointment                                     | Not primary             | Hedge's $g_s$     | 0.30        | 0.14           |
|                                                         |                   |      |                   |                     |                    |              |         |            |               |             | Attendance at the last appointment                                      | Not primary             | Hedge's $g_s$     | 0.67        | 0.15           |
|                                                         |                   |      |                   |                     |                    |              |         |            |               |             | Proportion of participants attending all sessions                       | Not primary             | Hedge's $g_s$     | 0.59        | 0.15           |
|                                                         |                   |      |                   |                     |                    |              |         |            |               |             | Proportion of participants not attending any sessions                   | Not primary             | Hedge's $g_s$     | 0.39        | 0.24           |
| Morgenstern et al., 2006                                | <u>Attendance</u> | 36.3 | 100.0             | 100.0               | SUD                | Yes          | Between | Yes        | Strong        | 302         | Odds of dropping out of treatment                                       | Not primary             | Hedge's $g_s$     | 0.35        | 0.14           |
|                                                         |                   |      |                   |                     |                    |              |         |            |               | 302         | Treatment initiation                                                    | Not primary             | Hedge's $g_s$     | 0.37        | 0.13           |
|                                                         |                   |      |                   |                     |                    |              |         |            |               | 302         | Treatment retention                                                     | Not primary             | Hedge's $g_s$     | 0.59        | 0.13           |
| Noordraven et al., 2017                                 | <u>Medication</u> | 40.7 | 24.5              | 62.0                | Psychotic disorder | Yes          | Between | Yes        | Strong        | 155         | Rate of antipsychotic depots received                                   | Primary                 | Hedge's $g_s$     | 0.89        | 0.17           |
|                                                         |                   |      |                   |                     |                    |              |         |            |               | 155         | The longest uninterrupted time during which depots were received (days) | Not primary             | Hedge's $g_s$     | 0.93        | 0.17           |
|                                                         |                   |      |                   |                     |                    |              |         |            |               | 154         | Time between prescription date and date depot was received (days)       | Not primary             | Hedge's $g_s$     | 0.37        | 0.16           |
|                                                         |                   |      |                   |                     |                    |              |         |            |               | 155         | Total number of days without depot medication (days)                    | Not primary             | Hedge's $g_s$     | 0.92        | 0.17           |
| Petry et al., 2006                                      | <u>Tx goals</u>   | 37.2 | 40.0              | 46.6                | SUD                | Yes          | Between | Yes        | Strong        | 70          | Only functional outcome                                                 | NA                      | NA                | NA          | NA             |
| Petry et al., 2012                                      | <u>Attendance</u> | 36.5 | 52.8              | 52.5                | SUD                | Yes          | Between | Yes        | Strong        | 215         | Weeks retained in treatment                                             | Not primary             | Hedge's $g_s$     | -0.16       | 0.14           |
|                                                         |                   |      |                   |                     |                    |              |         |            |               | 215         | Number of sessions attended                                             | Primary                 | Hedge's $g_s$     | 0.80        | 0.14           |
| Petry et al., 2018                                      | <u>Attendance</u> | 38.1 | 52.2              | 40.9                | SUD                | Yes          | Between | No         | Strong        | 141         | Days attended                                                           | Not primary             | Hedge's $g_s$     | 0.61        | 0.17           |
|                                                         |                   |      |                   |                     |                    |              |         |            |               | 141         | % of days attended                                                      | Primary                 | Hedge's $g_s$     | 0.55        | 0.17           |
|                                                         |                   |      |                   |                     |                    |              |         |            |               | 141         | Longest attendance (days)                                               | Not primary             | Hedge's $g_s$     | 0.58        | 0.17           |
| Post et al., 2006                                       | <u>Attendance</u> | 46.0 | 85.0              | 100.0               | Depression         | No           | Within  | No         | Moderate      | 50          | Proportion of scheduled appointments kept                               | Primary                 | Hedge's $g_{wvc}$ | 0.05        | 0.04           |
| Predergast et al., 2015, Admission phase                | <u>Attendance</u> | 43.4 | 0.0               | 87.9                | SUD                | No           | Between | Yes        | Strong        | 60          | Admission to the residential treatment program                          | Primary                 | Hedge's $g_s$     | -0.10       | 0.30           |
| Predergast et al., 2015 <sup>e</sup> , Attendance phase | <u>Attendance</u> | 43.6 | 0.0               | 86.6                | SUD                | No           | Between | Yes        | Strong        | 202         | Number of days in attendance at the residential treatment program       | Primary                 | Hedge's $g_s$     | -0.04       | 0.14           |
| Predergast et al., 2015, Attendance phase               |                   |      |                   |                     |                    |              |         |            |               | 202         | % still in treatment at the intervention's end                          | Not primary             | Hedge's $g_s$     | -0.13       | 0.18           |
| Preston et al., 1999                                    | <u>Medication</u> | 33.5 | 36.1              | 84.3                | SUD                | Yes          | Between | Yes        | Moderate      | 39          | Mean number of naltrexone doses ingested                                | Primary                 | Hedge's $g_s$     | 1.47        | 0.36           |
|                                                         |                   |      |                   |                     |                    |              |         |            |               | 39          | Maximum number of consecutive naltrexone doses ingested                 | Not primary             | Hedge's $g_s$     | 1.61        | 0.37           |
| Priebe et al., 2013 <sup>d</sup>                        | <u>Medication</u> | 43.7 | 26.0              | 40.0                | Psychotic disorder | Yes          | Between | Yes        | Strong        | 131         | % depots received in 12 month period                                    | Primary                 | Hedge's $g_s$     | 0.76        | 0.21           |
| Schacht et al., 2017                                    | <u>Attendance</u> | 37.4 | 79.0              | 29.0                | PTSD               | Yes          | Between | Yes        | Moderate      | 58          | Mean number of sessions attended                                        | Primary                 | Hedge's $g_s$     | 1.54        | 0.30           |

| Study                                                             | Outcome           | Proportion |        | Disorder Targeted | Met Criteria      | Design | Randomized | Study Quality | Sample Size | Effect Size Description | Effect Size Designation                                           | Effect Size Type | Effect Size       | Effect Size SE |          |
|-------------------------------------------------------------------|-------------------|------------|--------|-------------------|-------------------|--------|------------|---------------|-------------|-------------------------|-------------------------------------------------------------------|------------------|-------------------|----------------|----------|
|                                                                   |                   | Age        | Female |                   |                   |        |            |               |             |                         |                                                                   |                  |                   |                | Minority |
| Sigmon & Stitzer, 2005 <sup>e</sup> , Before vs. after incentives | <u>Attendance</u> | 41.0       | 42.0   | 61.0              | SUD               | No     | Between    | No            | Strong      | 69                      | % of sessions attended                                            | Primary          | Hedge's $g_s$     | 0.91           | 0.28     |
|                                                                   |                   |            |        |                   |                   |        |            |               |             |                         |                                                                   |                  |                   |                |          |
| Sigmon & Stitzer, 2005, Those experiencing incentives vs. not     | <u>Attendance</u> | 41.0       | 42.0   | 61.0              | SUD               | No     | Within     | No            | Strong      | 33                      | % of sessions attended                                            | Primary          | Hedge's $g_{ave}$ | 0.71           | 0.06     |
|                                                                   |                   |            |        |                   |                   |        |            |               |             |                         |                                                                   |                  |                   |                |          |
| Sinha et al., 2003                                                | <u>Attendance</u> | 20.6       | 7.8    | 77.0              | SUD               | Yes    | Between    | Yes           | Moderate    | 65                      | Number of sessions attended                                       | Primary          | Hedge's $g_s$     | 0.44           | 0.25     |
|                                                                   |                   |            |        |                   |                   |        |            |               |             |                         |                                                                   |                  |                   |                |          |
| Stanger et al., 2011                                              | <u>Attendance</u> | 30.0       | 100.0  | 32.0              | SUD               | Yes    | Between    | No            | Moderate    | 47                      | Number of sessions attended                                       | Primary          | Hedge's $g_s$     | -0.25          | 0.30     |
| Stanger et al., 2011                                              | <u>Tx goals</u>   | 30.0       | 100.0  | 32.0              | SUD               | Yes    | Between    | No            | Moderate    | 47                      | Number of assignments completed                                   | Primary          | Hedge's $g_s$     | -0.13          | 0.30     |
|                                                                   |                   |            |        |                   |                   |        |            |               | Moderate    | 47                      | % calls made                                                      | Primary          | Hedge's $g_s$     | 0.75           | 0.31     |
| Svikis et al., 1997 <sup>f</sup>                                  | <u>Attendance</u> | 28.4       | 100.0  | 84.5              | SUD               | Yes    | Between    | Yes           | Strong      | 142                     | Full day treatment attendance                                     | Primary          | Hedge's $g_s$     | 0.17           | 0.19     |
| Svikis et al., 2007                                               | <u>Attendance</u> | 30.1       | 100.0  | 84.0              | SUD               | Yes    | Between    | Yes           | Strong      | 91                      | Number of days in treatment                                       | Primary          | Hedge's $g_s$     | 0.57           | 0.21     |
|                                                                   |                   |            |        |                   |                   |        |            |               |             |                         | Odds of dropping out of treatment                                 | Not primary      | Hedge's $g_s$     | -0.02          | 0.24     |
|                                                                   |                   |            |        |                   |                   |        |            |               |             |                         | Consistent attendance                                             | Not primary      | Hedge's $g_s$     | 0.78           | 0.28     |
| Walker et al., 2010, Site 1 <sup>df</sup>                         | <u>Attendance</u> | Msg        | Msg    | 13.0              | SUD               | No     | Within     | No            | Strong      | 45                      | Average number of sessions attended                               | Primary          | Hedge's $g_{ave}$ | 1.12           | 0.05     |
| Walker et al., 2010, Site 2 <sup>f</sup>                          | <u>Attendance</u> | Msg        | 100.0  | 48.0              | SUD               | No     | Within     | No            | Strong      | 45                      | Average number of sessions attended                               | Primary          | Hedge's $g_{ave}$ | 1.46           | 0.05     |
| Worden et al., 2017                                               | <u>Tx goals</u>   | 51.5       | 64.3   | 7.1               | Hoarding disorder | Yes    | Between    | No            | Strong      | 20                      | Reductions in household clutter on the Clutter Image Rating Scale | Not primary      | Hedge's $g_s$     | 1.26           | 0.50     |

SE = Standard Error; Attendance = Treatment attendance; Medication = Medication adherence; Tx goals = Treatment goal completion; Msg = missing; NA = Not Applicable; SUD = Substance use disorder; SMI = Serious Mental Illness; PTSD = Post-traumatic stress disorder. Disorder Targeted = Type of disorder targeted with incentives; Met Criteria = Participants met diagnostic criteria for a mental health disorder.

<sup>a</sup>We excluded groups offering alternative treatments (reduction of logistical barriers; motivational interviewing) because they did not qualify as control groups

<sup>b</sup>We pooled effect sizes for analyses of only primary outcomes (see Table 2) as there were two primary outcomes

<sup>c</sup>We excluded the de-escalating incentive group as this incentive structure differed from all other studies and also did not qualify as a control group

<sup>d</sup>Effect size was adjusted based on the Intraclass Correlation Coefficient (ICC) reported

<sup>e</sup>Effect size for this sub-study was randomly selected for Models 2 and 3 (see Table 1), which could only accommodate one effect size per study

<sup>f</sup>Effect size information was provided by the authors

**Table S3.***Studies Excluded Due to Lack of Information Needed to Calculate Effect Sizes*

| Study                                                                                                                                                                                                                                                                                                                                                                                                                                                                                  | Reason Excluded                                                                                                                                                                                                       |
|----------------------------------------------------------------------------------------------------------------------------------------------------------------------------------------------------------------------------------------------------------------------------------------------------------------------------------------------------------------------------------------------------------------------------------------------------------------------------------------|-----------------------------------------------------------------------------------------------------------------------------------------------------------------------------------------------------------------------|
| 1. Jones, H. E., Haug, N. A., Stitzer, M. L., & Svikis, D. S. (2000). Improving treatment outcomes for pregnant drug-dependent women using low-magnitude voucher incentives. <i>Addictive Behaviors, 25</i> (2), 263-267.                                                                                                                                                                                                                                                              | Paper did not report standard deviations (only means were included). Authors were unable to provide additional information.                                                                                           |
| 2. Petry, N. M., Martin, B., & Finocche, C. (2001). Contingency management in group treatment: A demonstration project in an HIV drop-in center. <i>Journal of Substance Abuse Treatment, 21</i> (2), 89-96.                                                                                                                                                                                                                                                                           | Paper did not report standard deviations (only means were included) and we could not accurately interpret effect size data from the figure. Authors were unable to provide additional information.                    |
| 3. Rhodes, G. L., Saules, K. K., Helmus, T. C., Roll, J., BeShears, R. S., Ledgerwood, D. M., & Schuster, C. R. (2003). Improving on-time counseling attendance in a methadone treatment program: A contingency management approach. <i>The American Journal of Drug and Alcohol Abuse, 29</i> (4), 759-773.                                                                                                                                                                           | Paper did not report standard deviations (only means were included) and we could not use t-test data to calculate the effect size for a within-subjects study. Authors were unable to provide additional information. |
| 4. Iguchi, M. Y., Belding, M. A., Morral, A. R., Lamb, R. J., & Husband, S. D. (1997). Reinforcing operants other than abstinence in drug abuse treatment: An effective alternative for reducing drug use. <i>Journal of Consulting and Clinical Psychology, 65</i> (3), 421-428.                                                                                                                                                                                                      | Completion of treatment goals was not measured in the control group.                                                                                                                                                  |
| 5. McKay, J. R., Van Horn, D., Ivey, M., Drapkin, M. L., Rennert, L., & Lynch, K. G. (2013). Enhanced continuing care provided in parallel to intensive outpatient treatment does not improve outcomes for patients with cocaine dependence. <i>Journal of Studies on Alcohol and Drugs, 74</i> (4), 642-651.                                                                                                                                                                          | The control group was not offered the opportunity to attend the treatment that was incentivized for the intervention group (continuing care appointments).                                                            |
| 6. Ondersma, S. J., Svikis, D. S., & Schuster, C. R. (2007). Computer-based brief intervention: A randomized trial with postpartum women. <i>American Journal of Preventive Medicine, 32</i> (3), 231-238.                                                                                                                                                                                                                                                                             | Participants could receive a financial incentive to attend a treatment intake session, but no participants in the intervention condition attended the intake session and received this incentive.                     |
| 7. Strecher, V. J., Becker, M. H., Kirscht, J. P., Eraker, S. A., & Graham-Tomasi, R. P. (1985). Evaluation of a minimal-contact smoking cessation program in a health care setting. <i>Patient Education and Counseling, 7</i> (4), 395-407.                                                                                                                                                                                                                                          | Completion of treatment goals was not measured in the control group.                                                                                                                                                  |
| 8. Villano, C. L., Rosenblum, A., Magura, S., & Fong, C. (2002). Improving treatment engagement and outcomes for cocaine-using methadone patients. <i>The American Journal of Drug and Alcohol Abuse, 28</i> (2), 213-230.<br>Full RCT reported in: Magura, S., Rosenblum, A., Fong, C., Villano, C., & Richman, B. (2002). Treating cocaine-using methadone patients: Predictors of outcomes in a psychosocial clinical trial. <i>Substance Use &amp; Misuse, 37</i> (14), 1927-1955. | Completion of treatment goals was not measured in the control group.                                                                                                                                                  |



**Table S4.***Study Characteristics for Self-reported or Clinical-rated Symptom and Functional Outcomes*

| Study                                | Outcome                            | Sample Size | Effect Size Description                                                | Effect Size Type  | Effect Size | Effect Size SE |
|--------------------------------------|------------------------------------|-------------|------------------------------------------------------------------------|-------------------|-------------|----------------|
| Kidorf et al., 2018 <sup>a</sup>     | <b>Attendance &amp; Medication</b> | 143         | Addiction Severity Index (ASI), Drug                                   | Hedge's $g_s$     | 0.08        | 0.17           |
|                                      |                                    | 143         | Addiction Severity Index (ASI), Alcohol                                | Hedge's $g_s$     | -0.03       | 0.17           |
| Litt et al., 2007 <sup>a</sup>       | <b>Tx Goals</b>                    | 130         | The Drinker Inventory of Consequences (DRInC)                          | Hedge's $g_s$     | 0.12        | 0.18           |
| Marcus et al., 2020                  | <b>Medication</b>                  | 80          | Patient Health Questionnaire 9 items - response                        | Hedge's $g_s$     | 0.56        | 0.26           |
|                                      |                                    | 80          | Patient Health Questionnaire 9 items - remission                       | Hedge's $g_s$     | 1.03        | 0.38           |
| Metrebian et al., 2021 <sup>ab</sup> | <b>Attendance</b>                  | 347         | Alcohol Use Disorders Identification Test (AUDIT)                      | Hedge's $g_s$     | -0.03       | 0.15           |
|                                      |                                    | 347         | Opiate Treatment Index (OTI), Social Functioning                       | Hedge's $g_s$     | 0.01        | 0.15           |
|                                      |                                    | 347         | Short Form Survey (SF-36), Mental wellbeing                            | Hedge's $g_s$     | 0.23        | 0.15           |
|                                      |                                    | 347         | Short Form Survey (SF-36), Physical wellbeing                          | Hedge's $g_s$     | 0.06        | 0.15           |
|                                      |                                    | 347         | Hospital Anxiety and Depression Scale (HADS), Depression               | Hedge's $g_s$     | 0.15        | 0.15           |
|                                      |                                    | 347         | Hospital Anxiety and Depression Scale (HADS), Anxiety                  | Hedge's $g_s$     | 0.15        | 0.15           |
|                                      |                                    | 347         | Hospital Anxiety and Depression Scale (HADS), Depression               | Hedge's $g_s$     | 0.15        | 0.15           |
| Noordraven et al., 2017              | <b>Medication</b>                  | 131         | Manchester Short Assessment of Quality of Life (MANSA)                 | Hedge's $g_s$     | -0.22       | 0.18           |
|                                      |                                    | 131         | Positive and Negative Syndrome Scale (PANSS)                           | Hedge's $g_s$     | -0.28       | 0.18           |
|                                      |                                    | 133         | Health of the Nation Outcomes Scale (HoNOS)                            | Hedge's $g_s$     | -0.32       | 0.17           |
|                                      |                                    | 134         | Addiction Severity Index (ASI), Alcohol                                | Hedge's $g_s$     | -0.18       | 0.17           |
|                                      |                                    | 134         | Addiction Severity Index (ASI), Drug                                   | Hedge's $g_s$     | -0.07       | 0.17           |
| Petry et al., 2006                   | <b>Tx Goals</b>                    | 70          | Addiction Severity Index (ASI), Medical                                | Hedge's $g_s$     | -0.20       | 0.24           |
|                                      |                                    | 70          | Addiction Severity Index (ASI), Employment                             | Hedge's $g_s$     | -0.11       | 0.24           |
|                                      |                                    | 70          | Addiction Severity Index (ASI), Alcohol                                | Hedge's $g_s$     | -0.08       | 0.24           |
|                                      |                                    | 70          | Addiction Severity Index (ASI), Drug                                   | Hedge's $g_s$     | -0.35       | 0.24           |
|                                      |                                    | 70          | Addiction Severity Index (ASI), Cocaine                                | Hedge's $g_s$     | -0.39       | 0.24           |
|                                      |                                    | 70          | Addiction Severity Index (ASI), Legal                                  | Hedge's $g_s$     | 0.22        | 0.24           |
|                                      |                                    | 70          | Addiction Severity Index (ASI), Gambling                               | Hedge's $g_s$     | 0.60        | 0.25           |
|                                      |                                    | 70          | Addiction Severity Index (ASI), Family                                 | Hedge's $g_s$     | -0.33       | 0.24           |
|                                      |                                    | 70          | Addiction Severity Index (ASI), Psychiatric                            | Hedge's $g_s$     | -0.04       | 0.24           |
|                                      |                                    | 50          | Patient Health Questionnaire 9 items                                   | Hedge's $g_{ave}$ | 0.28        | 0.04           |
| Priebe et al., 2013                  | <b>Medication</b>                  | 88          | DIALOG (subjective quality of life)                                    | Hedge's $g_s$     | 0.34        | 0.22           |
| Schacht et al., 2017                 | <b>Attendance</b>                  | 50          | Quality of Life Enjoyment and Satisfaction Questionnaire (Q-LES) Short | Hedge's $g_s$     | 0.23        | 0.28           |
|                                      |                                    | 50          | The Clinician-Administered PTSD Scale for DSM-IV (CAPS)                | Hedge's $g_s$     | 0.42        | 0.29           |
|                                      |                                    | 50          | The Symptom Checklist 90-Revised (SCL-90), Global Severity Index       | Hedge's $g_s$     | 0.14        | 0.28           |
| Sinha et al., 2003                   | <b>Attendance</b>                  | 65          | Addiction Severity Index (ASI), Marijuana                              | Hedge's $g_s$     | -0.18       | 0.25           |
|                                      |                                    | 65          | Addiction Severity Index (ASI), Legal                                  | Hedge's $g_s$     | 0.31        | 0.25           |

|                      |                                  |    |                                                                              |               |       |      |
|----------------------|----------------------------------|----|------------------------------------------------------------------------------|---------------|-------|------|
| Stanger et al., 2011 | <b>Attendance &amp; Tx Goals</b> | 37 | Adult Self Report, Maternal Internalizing                                    | Hedge's $g_s$ | 0.10  | 0.35 |
|                      |                                  | 37 | Adult Self Report, Maternal Externalizing                                    | Hedge's $g_s$ | -0.11 | 0.35 |
| Worden et al., 2017  | <b>Tx Goals</b>                  | 20 | Saving Inventory Revised (SI-R)                                              | Hedge's $g_s$ | 0.42  | 0.45 |
|                      |                                  | 20 | Clinical Global Impression (Hoarding Disorder) Scales (CGI), clinician rated | Hedge's $g_s$ | 0.24  | 0.45 |

Note. SE = Standard Error; Attendance = Treatment attendance; Medication = Medication adherence; Tx goals = Treatment goal completion

<sup>a</sup>Effect size information was provided by authors

<sup>b</sup>Effect size was adjusted based on the Intraclass Correlation Coefficient (ICC) reported

**Table S5.***Study Characteristics for Substance Use Outcomes Measured with Urine Toxicology Screens (Treatment Attendance Studies Only)*

| <b>Study</b>                        | <b>Sample Size</b> | <b>Drug</b> | <b>Effect size description</b>      | <b>Effect size type</b> | <b>Effect Size</b> | <b>Effect Size SE</b> |
|-------------------------------------|--------------------|-------------|-------------------------------------|-------------------------|--------------------|-----------------------|
| Carroll et al., 2012                | 68                 | Cannabis    | Percent positive samples            | Hedge's $g_s$           | -0.0154            | 0.243                 |
|                                     | 68                 | Cannabis    | Max consecutive negative samples    | Hedge's $g_s$           | -0.0319            | 0.243                 |
|                                     | 68                 | Cannabis    | Max consecutive days abstinent      | Hedge's $g_s$           | -0.012             | 0.243                 |
| McKay et al., 2013 <sup>a</sup>     | 155                | Cocaine     | Proportion with a positive sample   | Hedge's $g_s$           | -0.186             | 0.8225                |
| Schacht et al., 2017                | 38                 | Multiple    | Percent positive samples            | Hedge's $g_s$           | 0.0684             | 0.3287                |
| Petry et al., 2018                  | 141                | Multiple    | Longest period of abstinence        | Hedge's $g_s$           | 0.3638             | 0.1714                |
|                                     | 141                | Multiple    | Percent negative for all substances | Hedge's $g_s$           | 0.5045             | 0.1726                |
| Petry et al., 2012                  | 215                | Multiple    | Longest period of abstinence        | Hedge's $g_s$           | 0.3511             | 0.1375                |
|                                     | 215                | Multiple    | Percent negative for all substances | Hedge's $g_s$           | 0.2774             | 0.1371                |
| Metrebian et al., 2021 <sup>b</sup> | 347                | Heroin      | Odds of having a negative sample    | Hedge's $g_s$           | 0.4312598          | 0.4219                |

Note. SE = Standard Error.

<sup>a</sup>Effect size was pooled across months 3, 6, 9, and 12

<sup>b</sup>Effect size converted from odds ratio that was adjusted for clustering

**Table S6.***Results of Moderation Analyses for All Studies Incentivizing Treatment Attendance (k = 30)*

| Categorical Moderators                        |                                                       | F    | p    |
|-----------------------------------------------|-------------------------------------------------------|------|------|
| Incentivizing substance use or other disorder | Substance use = 26; Other disorder = 4                | 2.37 | .129 |
| Meets criteria for psychiatric disorder       | Yes = 18; No = 12                                     | 3.60 | .063 |
| Randomized vs. non-randomized design          | Randomized = 14; Non-randomized = 16                  | 0.21 | .650 |
| Between vs. within-subjects design            | Between = 26; Within = 4                              | 0.01 | .909 |
| Type of control group                         | Active = 23; Not active = 3 (No control group = 4)    | 0.12 | .731 |
| Control group received contingent rewards     | Yes = 4; No = 22 (No control group = 4)               | 1.51 | .224 |
| Community study                               | No = 20; Yes = 10                                     | 0.52 | .473 |
| Type of incentive                             | Vouchers = 20; Lottery = 10                           | 0.09 | .760 |
| Schedule of reinforcement                     | Fixed = 13; Escalating = 15 (1-time intervention = 2) | 0.00 | .953 |
| Coupons vs. gift cards                        | Coupons = 16; Gift cards = 14                         | 0.00 | .958 |
| Immediate vs. delayed reinforcement           | Immediate = 9; Delayed = 9 (Missing = 12)             | 0.04 | .843 |
| Overall study quality                         | Strong = 21; Moderate = 9                             | 0.32 | .573 |
| Information received from authors             | Yes = 2; No = 28                                      | 0.60 | .440 |
| Continuous Moderators                         |                                                       |      |      |
| Publication year                              | Missing = 0                                           | 0.23 | .635 |
| Mean age                                      | Missing = 4                                           | 0.53 | .468 |
| Sex (proportion female)                       | Missing = 1                                           | 0.30 | .589 |
| Race/Ethnicity (proportion minority)          | Missing = 1                                           | 0.00 | .954 |
| Length of treatment (weeks)                   | Missing = 1                                           | 0.02 | .886 |
| Number of incentivized sessions               | Missing = 6                                           | 0.06 | .811 |
| Total value of money or prizes                | Missing = 6                                           | 0.79 | .378 |
| Average value of money or prizes              | Missing = 12                                          | 0.28 | .601 |

*Note.* See Table 1 for more detailed descriptions of moderators. Moderators were tested using mixed effect models. Continuous moderators were mean centered prior to analysis. Studies included in parentheses were excluded from analyses.

Table S7.

*Quality of Included Studies*

| Study                    | Selection Bias | Study Design | Confounders | Blinding | Data Collection | Withdrawals and Dropouts | Global Rating |
|--------------------------|----------------|--------------|-------------|----------|-----------------|--------------------------|---------------|
| Acquavita et al., 2013   | Green          | Green        | Green       | Yellow   | Green           | Yellow                   | Strong        |
| Barton et al., 2020      | Red            | Yellow       | Green       | Green    | Green           | Yellow                   | Moderate      |
| Carey & Carey, 1990      | Green          | Yellow       | Green       | Yellow   | Green           | Yellow                   | Strong        |
| Carroll et al., 2012     | Red            | Green        | Green       | Green    | Green           | Yellow                   | Moderate      |
| Corrigan & Bogner, 2007  | Yellow         | Green        | Green       | Green    | Green           | Yellow                   | Strong        |
| Corrigan et al., 2005    | Yellow         | Green        | Green       | Green    | Green           | Yellow                   | Strong        |
| Fishman et al., 2020     | Green          | Green        | Green       | Green    | Green           | Yellow                   | Strong        |
| Fitzsimons et al., 2015  | Green          | Yellow       | Green       | Green    | Green           | Yellow                   | Strong        |
| Hartzler et al., 2014    | Green          | Yellow       | Red         | Green    | Green           | Yellow                   | Moderate      |
| Helmus et al., 2003      | Green          | Yellow       | Green       | Green    | Green           | Yellow                   | Strong        |
| Jones et al., 2001       | Green          | Green        | Green       | Green    | Green           | Yellow                   | Strong        |
| Kelly et al., 2014       | Green          | Yellow       | Green       | Green    | Red             | Yellow                   | Moderate      |
| Kidorf et al., 2009      | Yellow         | Green        | Green       | Green    | Green           | Yellow                   | Strong        |
| Kidorf et al., 2013      | Yellow         | Green        | Green       | Green    | Green           | Yellow                   | Strong        |
| Kidorf et al., 2018      | Yellow         | Green        | Green       | Green    | Green           | Yellow                   | Strong        |
| Kropp et al., 2017       | Green          | Yellow       | Green       | Green    | Green           | Yellow                   | Strong        |
| Langhorst, 2004          | Yellow         | Green        | Green       | Green    | Green           | Yellow                   | Strong        |
| Ledgerwood et al., 2008  | Yellow         | Yellow       | Green       | Green    | Green           | Yellow                   | Strong        |
| Litt et al., 2007        | Yellow         | Green        | Green       | Green    | Green           | Yellow                   | Strong        |
| Marcus et al., 2020      | Yellow         | Green        | Green       | Green    | Green           | Yellow                   | Strong        |
| McKay et al., 2013       | Yellow         | Green        | Green       | Green    | Green           | Yellow                   | Strong        |
| Metrebian et al., 2021   | Yellow         | Green        | Red         | Green    | Green           | Yellow                   | Moderate      |
| Morgenstern et al., 2006 | Green          | Green        | Green       | Green    | Green           | Yellow                   | Strong        |
| Noordraven et al., 2017  | Yellow         | Green        | Green       | Green    | Green           | Yellow                   | Strong        |
| Petry et al., 2006       | Yellow         | Green        | Green       | Green    | Green           | Yellow                   | Strong        |
| Petry et al., 2012       | Yellow         | Green        | Green       | Green    | Green           | Yellow                   | Strong        |
| Petry et al., 2018       | Yellow         | Green        | Green       | Green    | Green           | Yellow                   | Strong        |
| Post et al., 2006        | Yellow         | Yellow       | Green       | Green    | Red             | Yellow                   | Moderate      |
| Predergast et al., 2015  | Yellow         | Green        | Green       | Green    | Green           | Yellow                   | Strong        |

|                        |        |        |       |        |       |        |          |
|------------------------|--------|--------|-------|--------|-------|--------|----------|
| Preston et al., 1999   | Yellow | Green  | Green | Yellow | Green | Red    | Moderate |
| Priebe et al., 2013    | Green  | Green  | Green | Green  | Green | Green  | Strong   |
| Schacht et al., 2017   | Red    | Green  | Green | Yellow | Green | Green  | Moderate |
| Sigmon & Stitzer, 2005 | Green  | Yellow | Green | Green  | Green | Yellow | Strong   |
| Sinha et al., 2003     | Yellow | Green  | Red   | Yellow | Green | Green  | Moderate |
| Stanger et al., 2011   | Red    | Green  | Green | Yellow | Green | Green  | Moderate |
| Svikis et al., 1997    | Green  | Green  | Green | Green  | Green | Yellow | Strong   |
| Svikis et al., 2007    | Green  | Green  | Green | Yellow | Green | Yellow | Strong   |
| Walker et al., 2010    | Green  | Yellow | Green | Green  | Green | Yellow | Strong   |
| Worden et al., 2017    | Yellow | Yellow | Green | Yellow | Green | Yellow | Strong   |

Note. Green = strong rating; Yellow = moderate rating; Red = weak rating. Two authors rated each study using the Quality Assessment Tool for Quantitative Studies.

**Figure S1. Attendance: Primary Outcomes**

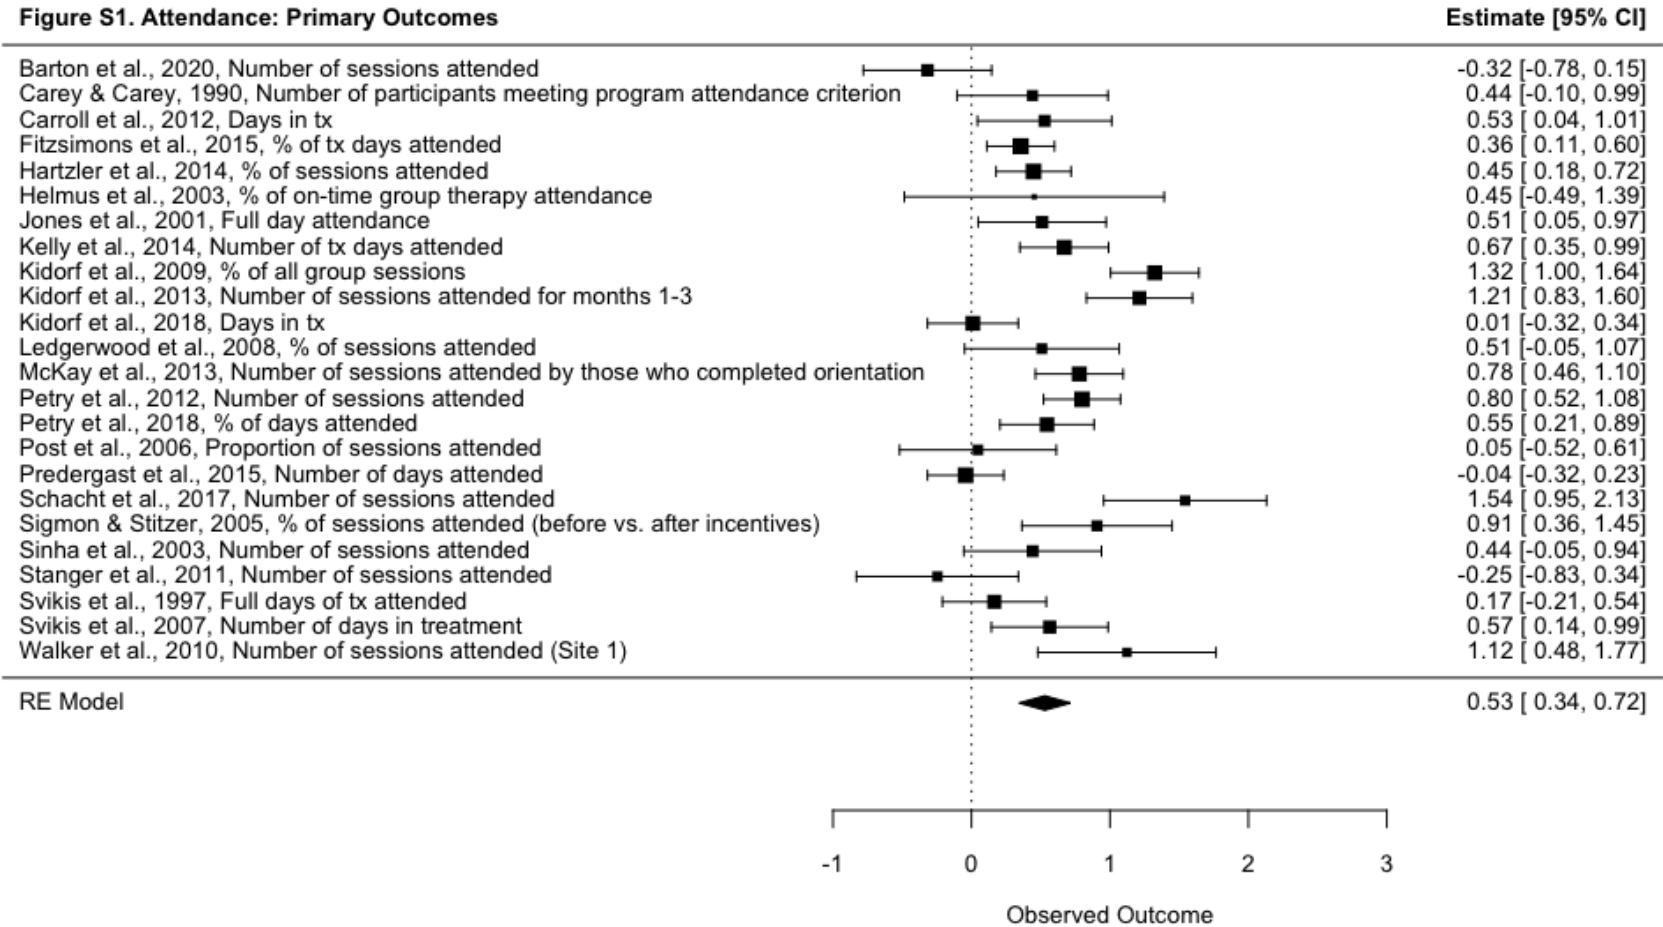

Figure S2. Medication: Primary Outcomes

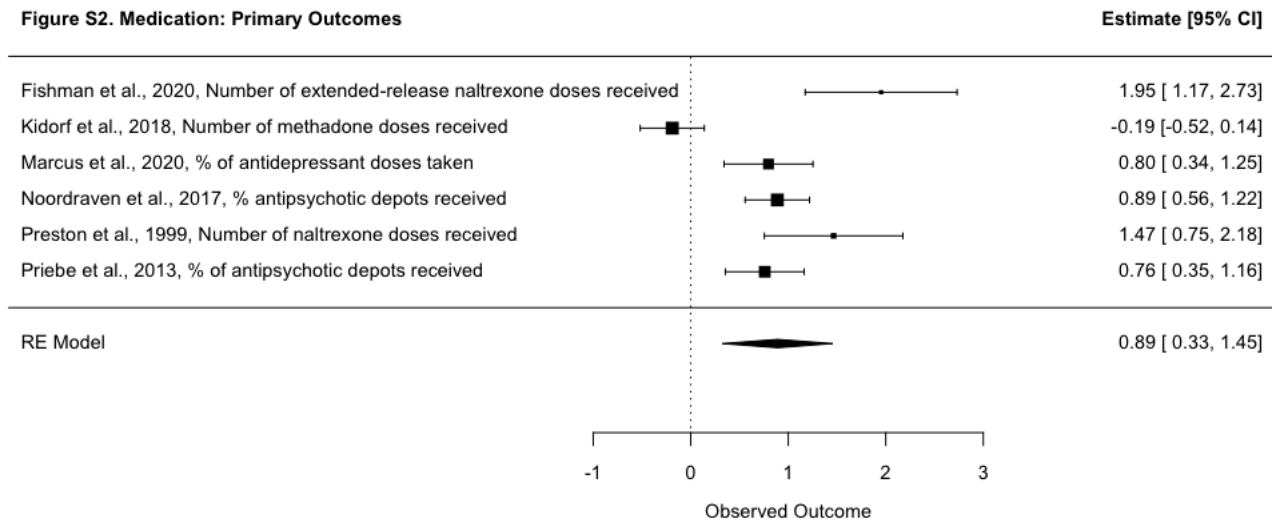



**Figure S3.**

*Funnel plot of Studies Incentivizing Attendance, Primary Outcomes (Model 3)*

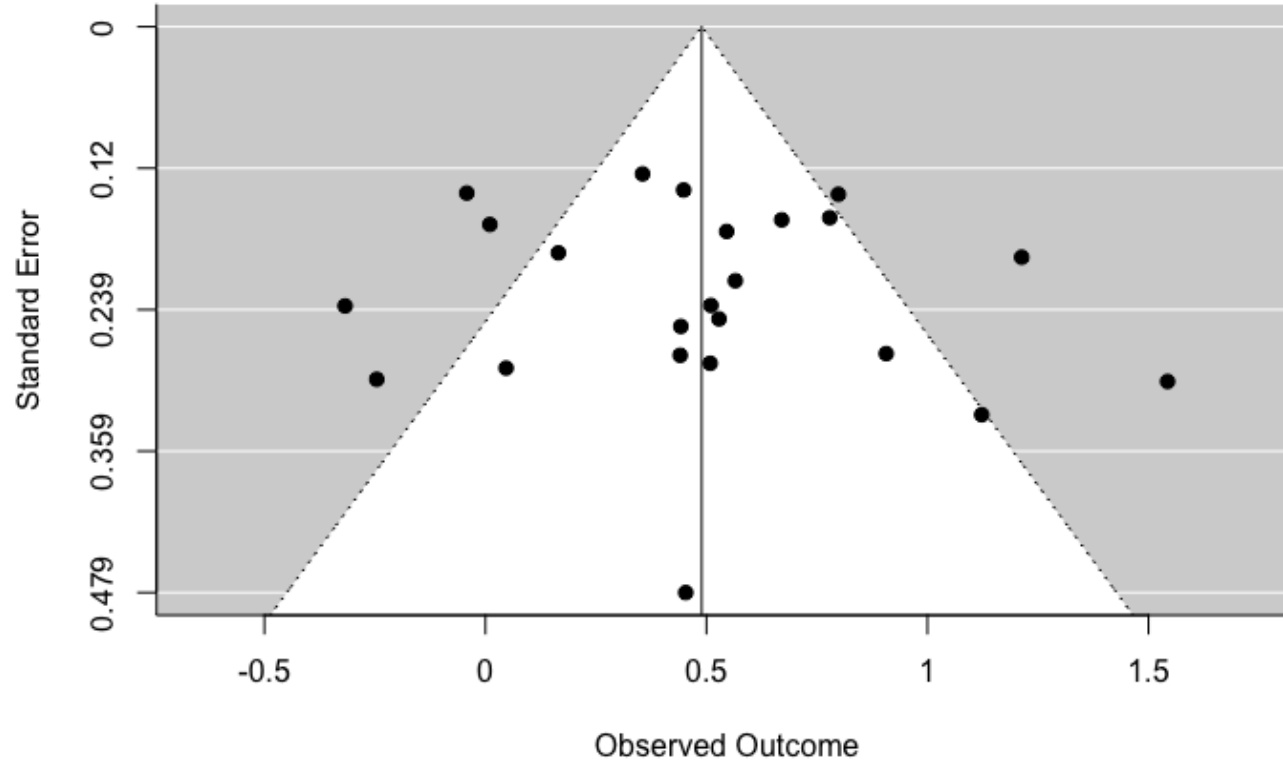

**Figure S4. Attendance: Symptom and Functional Outcomes**

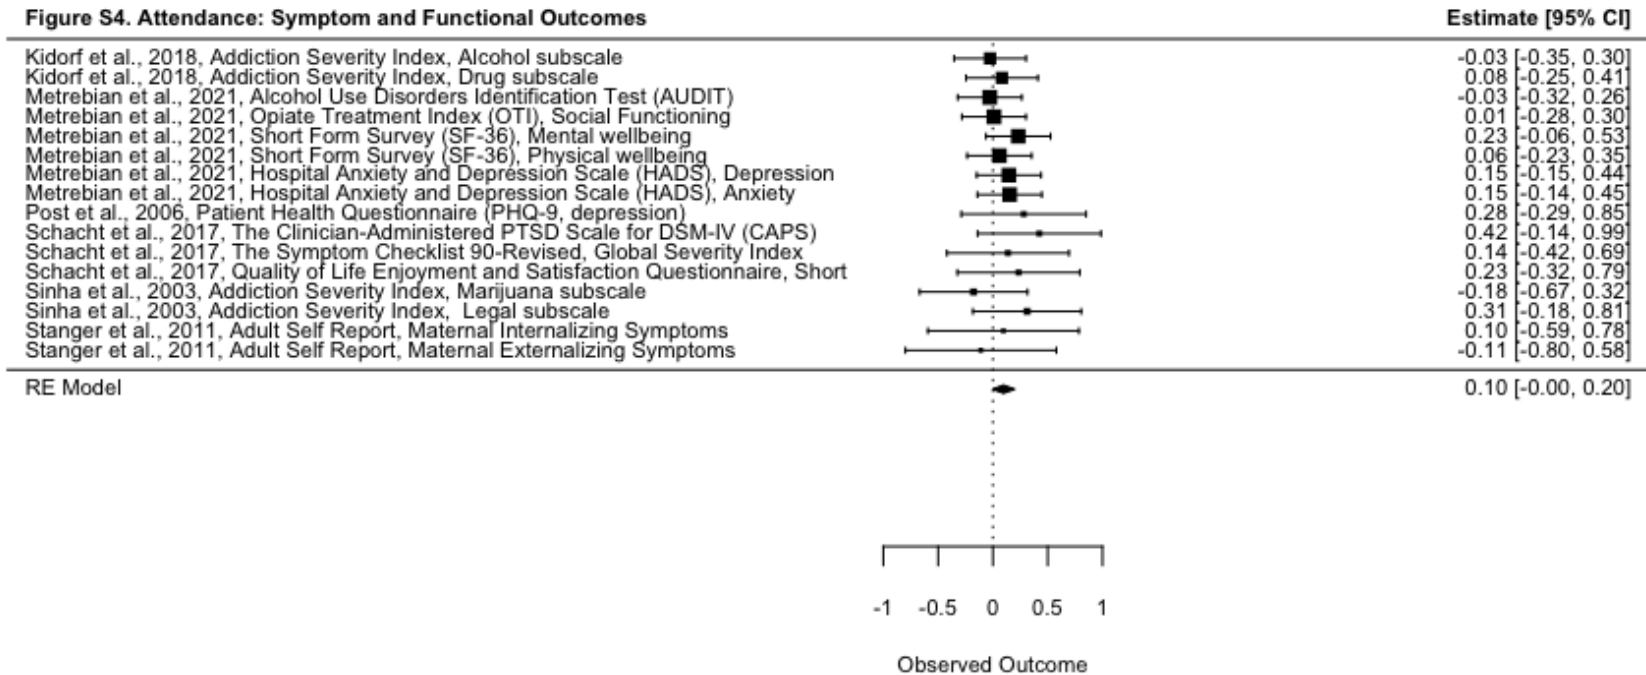

**Figure S5. Attendance: Symptom and Functional Outcomes Excluding Substance Use Symptoms**

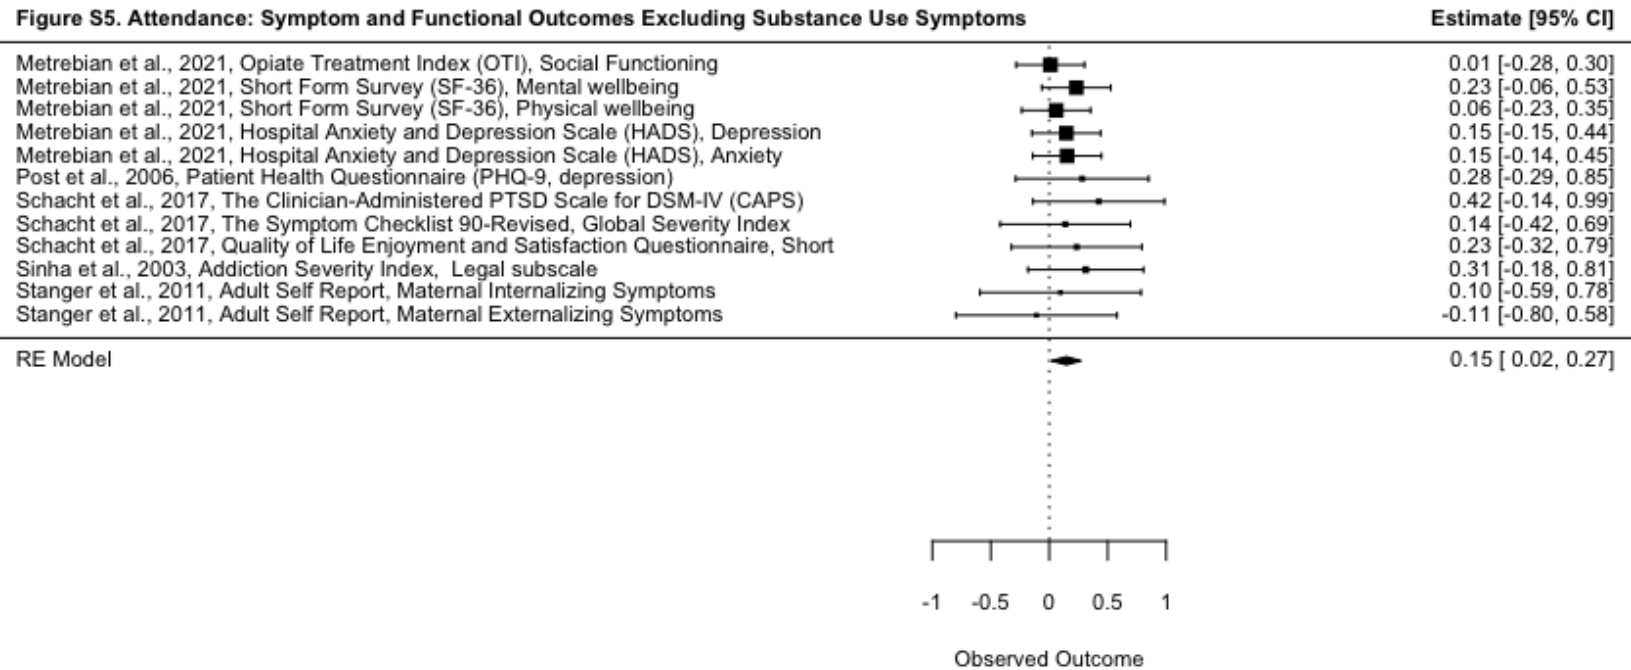

**Figure S6. Attendance: Urinary Toxicology Screens**

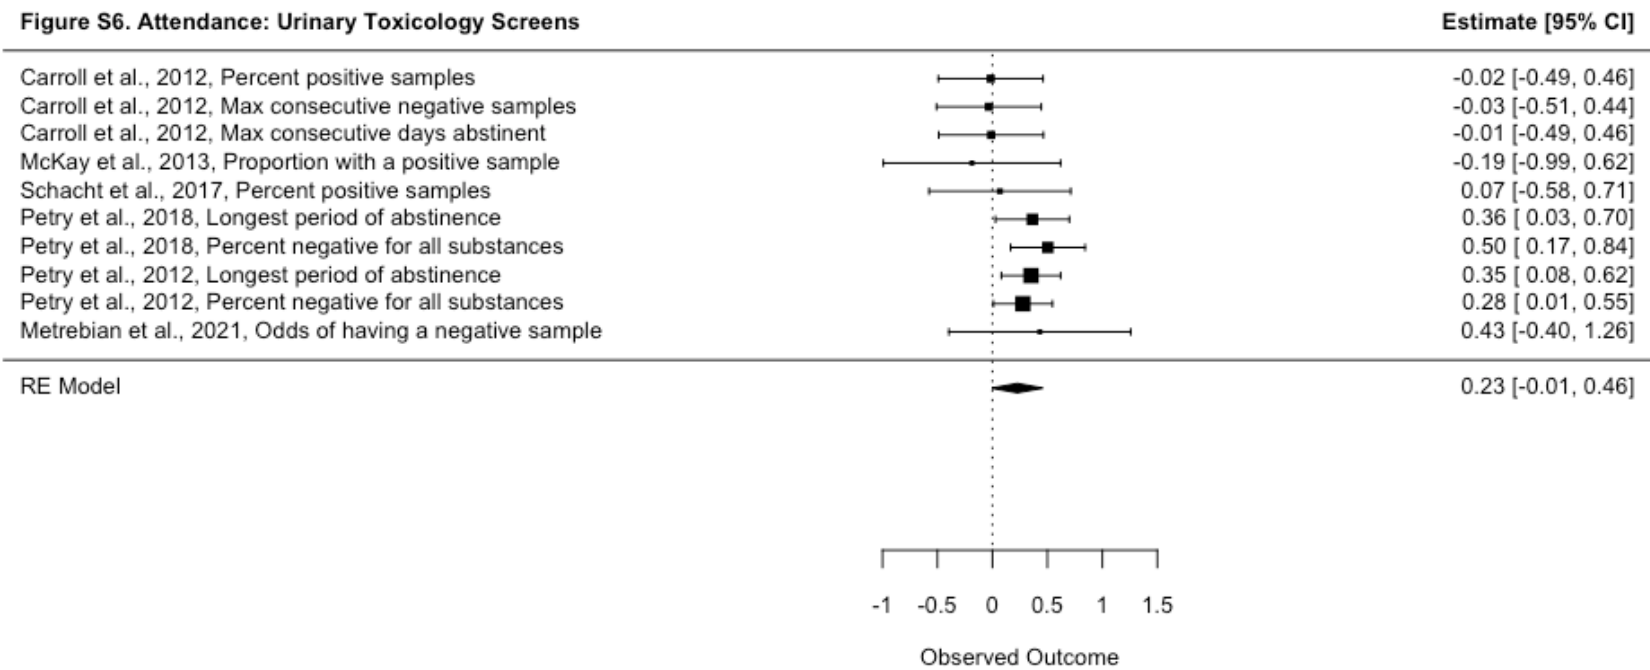

**Figure S7. Medication Adherence: Symptom and Functional Outcomes**

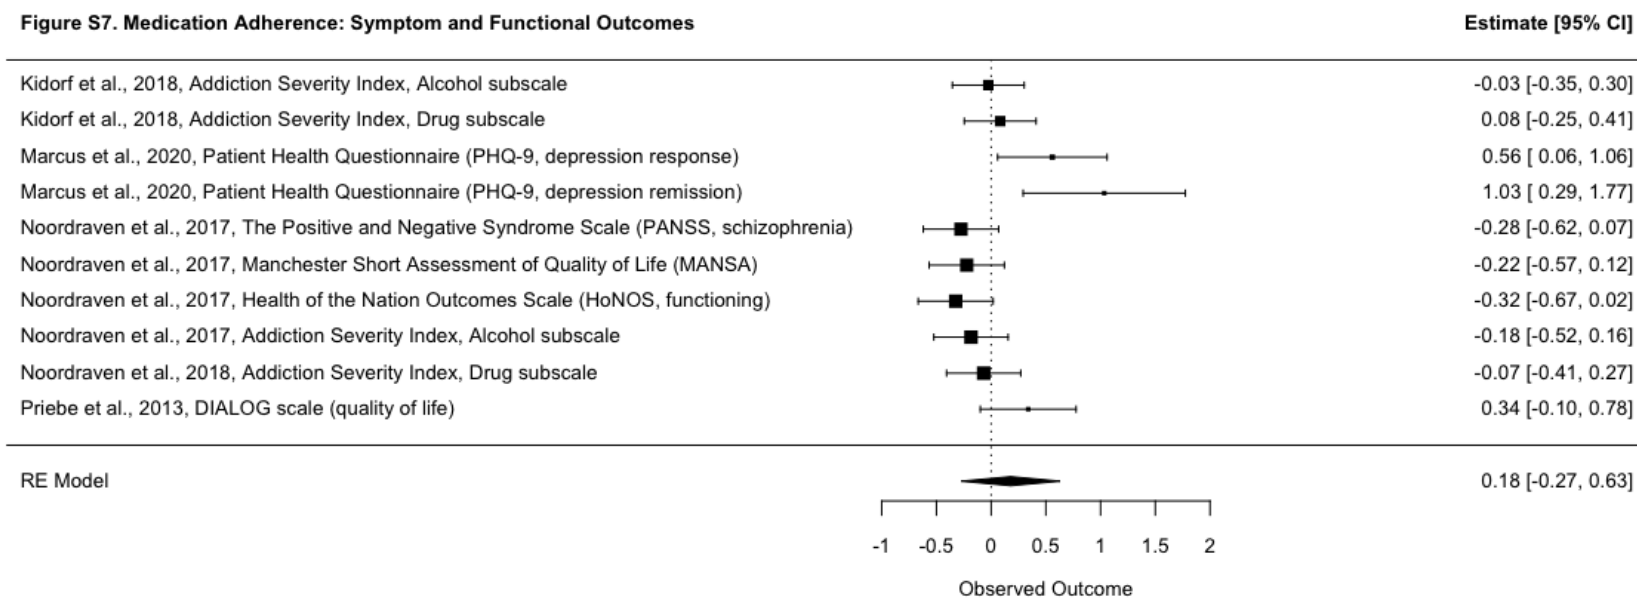

**Figure S8. Treatment Goal Completion: Symptom and Functional Outcomes**

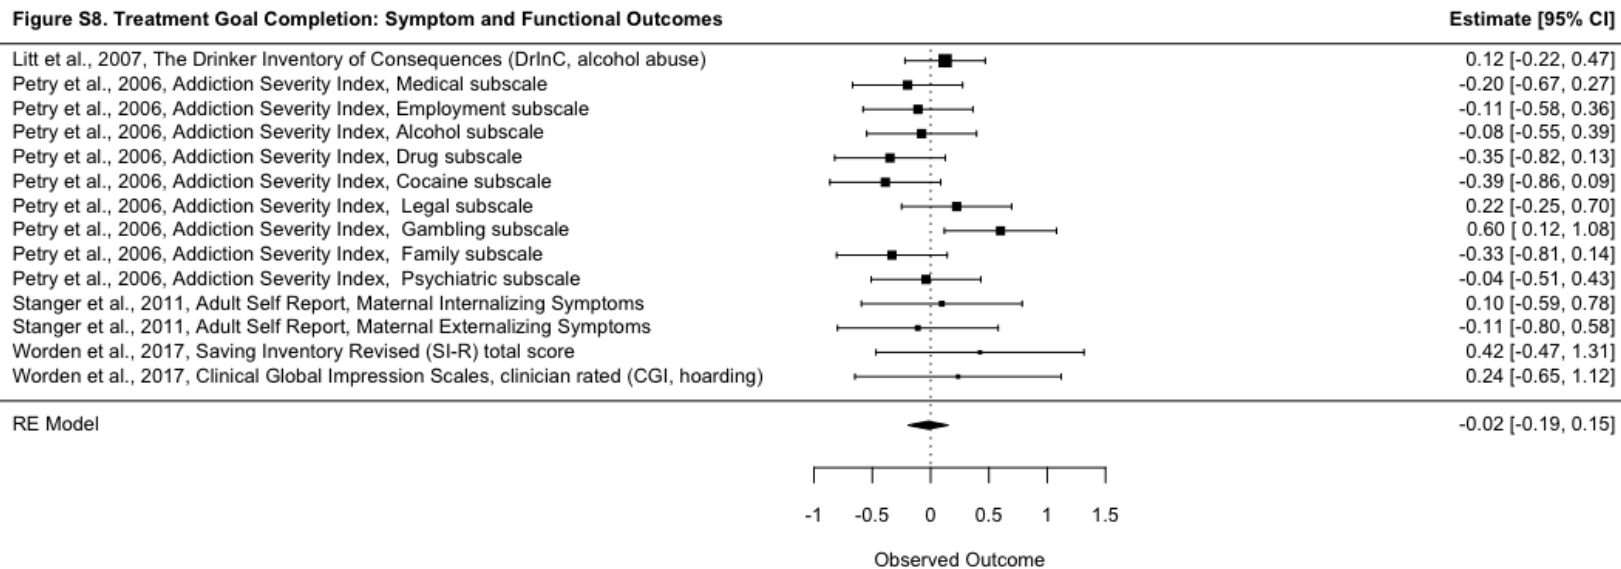

Supplement: NIHMS1830561-supplement-Supplemental_Material.pdf [file NIHMS1830561-supplement-Supplemental_Material.pdf]
